# Supplementary material for: Promiscuous Diffusible Signal Factor Production and Responsiveness of the Xylella fastidiosa Rpf System
Source: PubMed Central journal article supplement (PMC4958263; doi:10.1128/mbio.01054-16), 2016-07-19
Supplement: mbo004162902sf1.pdf [file mbo004162902sf1.pdf]

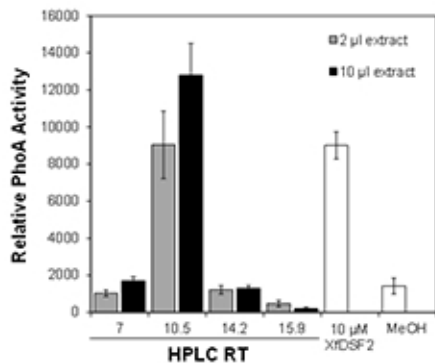

**Figure S1.** Induction of the *Xf*DSF biosensor by either 2 or 10  $\mu$ l of a purified fraction of a DSF-containing extract of *P. agglomerans* 299R expressing *X. fastidiosa* RpfF (fractions named based on their retention times in minutes in HPLC [HPLC RT]). White bars represent induction of the sensor by 10  $\mu$ M *Xf*DSF2 or MeOH only.
