# Supplementary material for: Promiscuous Diffusible Signal Factor Production and Responsiveness of the Xylella fastidiosa Rpf System
Source: PubMed Central journal article supplement (PMC4958263; doi:10.1128/mbio.01054-16), 2016-07-19
Supplement: mbo004162902sf3.pdf [file mbo004162902sf3.pdf]

Xf MSAVHPIPHPICESSIRIIEETHRNVYWIYMAHL---ARTTGAAAYFSLKLI DDIMNYQS  
 Pa MTVIN---QATCRLFTEVGNTTQLVAYYEEGRRTMWMMLRAQPRPSENHელიEEIMN---

Xf VLRQRLKEQTVQLPFVVLAS-DSNVFN LGGDLQLFCDLIRRKEREALLDYACRCVIRGAYA  
 Pa -LSYAAQRSGLPIDFWVTGSLVPMFNAGGDLRFFVFCIRNNRREALRAYARACVDCIHS

Xf FHAGLNANVHSTIALIQGNALGGGF EAALCCHTIVAEEGVMMGFPEVLFDFLPGMGAYSFM  
 Pa AARGFDTGAVTLAMIEGSALGGGF EAALAHFILAQNARMGFPEIAFNLFPGMGGYSLV

Xf RQRISPKLAERLILEGNLYSSEELLAIGLIDKVVPRGKGI EAVEQIIRDSKRRQYTWAAM  
 Pa ARRSGMKLAELICEGESHSAEWYETRGLVDKVFQPGDSYRATRTRFIDTLRPKLNGVRAM

Xf QEVKKIAHEVSLEEMIRITELWVDSALKLSNKSLRTMERLIRAQOTHKNTALK-N  
 Pa LKARQRVLQLSRAELMDITEDWVDYAFTIEPKDIAYMERLVQLQNRHSASLRKAG

**Figure S3.** Sequence identity (shade in black) and similarity (shade in grey) of *X. fastidiosa* Tem1 RpfF and *P. agglomerans* 299R F385\_3254. F385\_3254, encoding a protein with 37% identity to that of *X. fastidiosa* RpfF.
